WINTER 2019 | VOLUME 31 | NUMBER 1

The Journal of  
**Neuropsychiatry**  
and Clinical Neurosciences

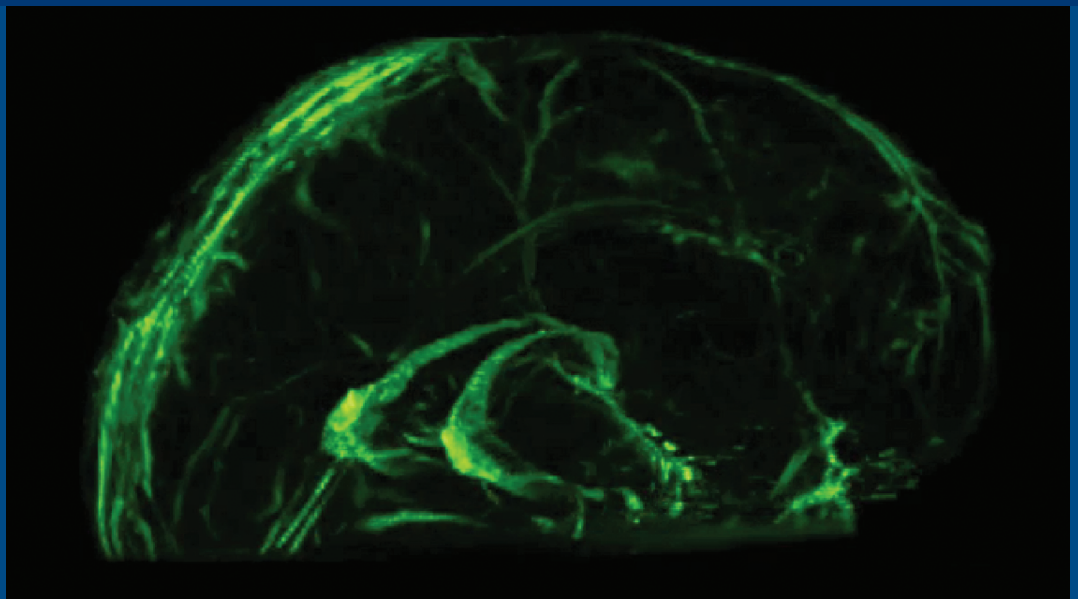

Klüver-Bucy Syndrome Following Traumatic Brain Injury:  
A Systematic Synthesis and Review of Pharmacological  
Treatment From Cases in Adolescents and Adults

The Relationship Between Prior Concussions and Depression Is  
Modified by Somatic Symptomatology in Retired NFL Athletes

Strong Association Between Migraine and Transient  
Global Amnesia: A National Inpatient Sample Analysis

Why We Still Use "Organic Causes": Results From a  
Survey of Psychiatrists and Residents

Fearful Attachment Linked to Childhood Abuse, Alexithymia,  
and Depression in Motor Functional Neurological Disorders

Official Journal of the American Neuropsychiatric Association  
[neuro.psychiatryonline.org](http://neuro.psychiatryonline.org)
