# The Maudsley Prescribing Guidelines in Psychiatry

## 13<sup>th</sup> Edition

Save 20%  
with promo code  
**VBR18**

\*Valid until 31 Dec 2019

### The ONLY Prescribing Guideline You Will Ever Need.

The revised and updated 13<sup>th</sup> edition of *The Maudsley Prescribing Guidelines in Psychiatry* provides up-to-date information, expert guidance on prescribing practice in mental health, including drug choice, treatment of adverse effects and how to augment or switch medications. The text covers a wide range of topics including pharmacological interventions for schizophrenia, bipolar disorder, depression and anxiety, and many other less common conditions. There is advice on prescribing in children and adolescents, in substance misuse and in special patient groups. This edition includes cariprazine, brexpiprazole, iloperidone, molindone, vilazodone, levomilnacipran, desvenlafaxine and pimavanserin.

Written for psychiatrists, neuropharmacologists, pharmacists and clinical psychologists as well as nurses and medical trainees, *The Maudsley Prescribing Guidelines in Psychiatry* are the established reference source for ensuring the safe and effective use of medications for patients presenting with mental health problems.

#### AUTHOR INFORMATION

**David M. Taylor** BSc MSc PhD FFRPS FRPharmS, is Director of Pharmacy and Pathology at the Maudsley Hospital and Professor of Psychopharmacology at King's College, London.

**Thomas R. E. Barnes**, MB BS, MD, FRCPsych, DSc, is Emeritus Professor of Clinical Psychiatry at Imperial College London and joint-head of the Prescribing Observatory for Mental Health at the Royal College of Psychiatrists' Centre for Quality Improvement.

**Allan H. Young**, MB, ChB, MPhil, PhD, FRCPC, FRCPsych, is Chair of Mood Disorders and is Director of the Centre for Affective Disorders in the Department of Psychological Medicine in the Institute of Psychiatry at King's College London, UK.

The Maudsley

## Prescribing Guidelines in Psychiatry

13<sup>TH</sup> EDITION

David M. Taylor  
Thomas R. E. Barnes  
Allan H. Young

WILEY Blackwell

Available at Wiley.com

ISBN: 978-1-119-44260-8  
Print: \$99.00 | eBook: \$79.99

## Access The Maudsley Wherever You Go

Purchase directly from [bookstore.medhand.com](http://bookstore.medhand.com)

Save 20% with discount code **maud13**

\*valid until Dec 2019

Works on both  
Android and Apple Devices!

MedHand Mobile Libraries

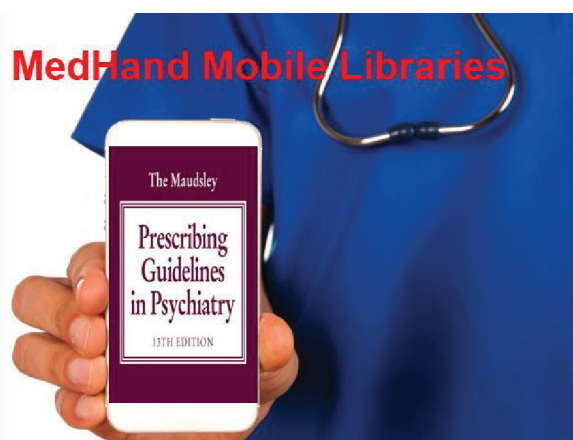

18-535201
